# Supplementary material
Source: HighWire-hosted journal article supplement (http://www.cmaj.ca/highwire/filestream/57665/field_highwire_adjunct_files/0/newfoundland-caseyAppendix1.pdf)
Supplement: newfoundland-caseyAppendix1.pdf [file newfoundland-caseyAppendix1.pdf]

Table 1-1 Nationally Weighted All Services\* Indices and All Services Medians, by Specialty and Province, 2007-2008

| Specialty                       | Province |        |        |        |       |        |        |        |        |        | All Services Median |
|---------------------------------|----------|--------|--------|--------|-------|--------|--------|--------|--------|--------|---------------------|
|                                 | N.L.     | P.E.I. | N.S.   | N.B.   | Que.  | Ont.   | Man.   | Sask.  | Alta.  | B.C.   |                     |
| Family Medicine                 | 88.46    | 80.56  | 101.90 | 105.14 | 74.52 | 98.10  | 90.68  | 105.84 | 110.22 | 107.30 | 37.00               |
| Medical Specialists             | 84.58    | 75.64  | 113.22 | 103.62 | 62.74 | 96.38  | 93.32  | 105.00 | 106.20 | 110.74 | 65.96               |
| Internal Medicine               | 79.50    | 72.90  | 108.90 | 99.04  | 67.26 | 102.64 | 99.30  | 100.70 | 109.32 | 105.24 | 62.99               |
| Neurology                       | 100.00   | -      | 106.76 | 78.12  | 65.12 | 102.40 | 99.96  | 84.56  | 120.00 | 128.02 | 95.13               |
| Psychiatry                      | 84.50    | 99.56  | 106.14 | 111.60 | 50.58 | 85.94  | 86.96  | 100.90 | 100.44 | 114.78 | 82.49               |
| Pediatrics                      | 106.42   | 50.70  | 117.38 | 108.28 | 63.74 | 78.60  | 70.86  | 103.92 | 111.06 | 96.08  | 72.73               |
| Dermatology                     | 95.62    | 110.92 | 161.52 | 143.48 | 73.80 | 88.12  | 99.08  | 121.64 | 100.64 | 99.36  | 38.77               |
| Physical Medicine               | -        | -      | 115.94 | 88.52  | 48.14 | 98.82  | 108.70 | 90.78  | 101.18 | 151.20 | 76.40               |
| Anesthesia                      | **       | **     | **     | **     | **    | **     | **     | **     | **     | **     | **                  |
| Surgical Specialists            | 93.30    | 90.50  | 99.40  | 103.80 | 75.98 | 92.36  | 100.92 | 100.60 | 118.16 | 107.08 | 83.74               |
| General Surgery                 | 83.06    | 80.12  | 99.38  | 112.64 | 74.08 | 95.18  | 100.62 | 112.12 | 130.32 | 113.62 | 100.01              |
| Thoracic/Cardiovascular Surgery | 65.28    | -      | 57.72  | 97.32  | 65.66 | 100.00 | 101.92 | 114.48 | 126.14 | 105.66 | 210.40              |
| Urology                         | 88.76    | 51.56  | 95.48  | 97.48  | 60.90 | 102.52 | 105.58 | 112.06 | 110.02 | 103.12 | 74.94               |
| Orthopedic Surgery              | 109.68   | 96.66  | 99.84  | 116.60 | 81.46 | 92.20  | 99.26  | 100.16 | 129.76 | 120.38 | 95.50               |
| Plastic Surgery                 | 81.50    | 8.68   | 109.24 | 114.80 | 68.24 | 81.44  | 112.72 | 97.20  | 112.50 | 102.80 | 96.88               |
| Neurosurgery                    | 99.92    | -      | 102.16 | 100.00 | 67.08 | 114.76 | 106.58 | 92.02  | 75.26  | 144.54 | 189.10              |
| Ophthalmology                   | 111.90   | 100.52 | 101.84 | 90.18  | 70.28 | 75.50  | 115.88 | 79.76  | 113.18 | 99.48  | 75.94               |
| Otolaryngology                  | 81.16    | 83.78  | 104.82 | 100.84 | 65.64 | 115.70 | 99.16  | 80.64  | 112.38 | 104.88 | 62.78               |
| Obstetrics/Gynecology           | 71.76    | 87.18  | 100.54 | 106.72 | 77.04 | 143.88 | 87.68  | 99.46  | 104.76 | 121.18 | 77.63               |
| Total Specialists               | 92.72    | 82.20  | 100.50 | 101.52 | 70.18 | 97.58  | 99.50  | 103.46 | 112.86 | 108.90 | 71.36               |
| Total Physicians                | 93.22    | 81.72  | 101.68 | 104.60 | 71.34 | 98.32  | 95.12  | 104.24 | 107.22 | 105.84 | 50.58               |

Notes

Blank cells are indicated by an "-". Indices are relative to the ten province median in the case of each individual specialty as well as for the Medical Specialists, Surgical Specialists, Total Specialists and Total Physicians groupings; that is the broad specialty indices are not weighted averages of the indices of each specialty. Consequently, it is possible that the index for Total Physicians does not fall between the index for Family Medicine and the index for Total Specialists in the case of some provinces. Similarly the index for Total Specialists may not lie between the Medical Specialists and Surgical Specialists indices.

\* Excluding radiology and laboratory services.

\*\* Anesthesia services and anesthesia specialists are excluded.

Source

National Physicians Database (NPDB), Canadian Institute for Health Information.
